# Supplementary material for: H3.3K27M mutant proteins reprogram epigenome by sequestering the PRC2 complex to poised enhancers
Source: eLife. 2018 Jun 22;7:e36696. doi: 10.7554/eLife.36696 (PMC6033537; doi:10.7554/eLife.36696)
Supplement: Figure 2—source data 1. [file elife-36696-fig2-data1.xlsx]

## Sheet: Sheet1
	Peaks unique in WT	Peaks unique in H3.3K27M	Common peaks
H3K27me3	12924	914	12303
Ezh2	1200	6653	8908
