# Supplementary material for: H3.3K27M mutant proteins reprogram epigenome by sequestering the PRC2 complex to poised enhancers
Source: eLife. 2018 Jun 22;7:e36696. doi: 10.7554/eLife.36696 (PMC6033537; doi:10.7554/eLife.36696)
Supplement: Figure 2—source data 2. [file elife-36696-fig2-data2.xlsx]

## Sheet: New all data
Ezh2 ChIP	WT	H3.3K27M #1	H3.3K27M #2		STD	WT	H3.3K27M #1	H3.3K27M #2
Enhancer 1	0.0593018	0.778656	0.883966		Enhancer 1	0.0187054	0.26187	0.179015
Enhancer 2	0.0618111	1.01283	1.05077		Enhancer 2	0.0193915	0.199271	0.205098
Enhancer 3	0.0607291	1.19646	1.10323		Enhancer 3	0.0190962	0.226942	0.313058
Hoxa1	3.35142	1.14882	1.64703		Hoxa1	0.475029	0.213634	0.281839
Actin	0.123117	0.177248	0.198657		Actin	0.0340828	0.0464666	0.0511642
H3.3K27M ChIP	WT	H3.3K27M #1	H3.3K27M #2		STD	WT	H3.3K27M #1	H3.3K27M #2
Enhancer 1	0.0529195	0.60428	0.477817		Enhancer 1	0.01694	0.132094	0.109181
Enhancer 2	0.0084828	1.16938	1.34115		Enhancer 2	0.00334457	0.222942	0.247886
Enhancer 3	0.036764	1.96222	1.52317		Enhancer 3	0.0123171	0.330911	0.273288
Hoxa1	0.0212768	0.0943017	0.0555049		Hoxa1	0.0073732	0.0183014	0.0119772
Actin	0.111092	4.13262	4.76696		Actin	0.0312124	0.787158	1.26874
