# Supplementary material for: H3.3K27M mutant proteins reprogram epigenome by sequestering the PRC2 complex to poised enhancers
Source: eLife. 2018 Jun 22;7:e36696. doi: 10.7554/eLife.36696 (PMC6033537; doi:10.7554/eLife.36696)
Supplement: Figure 4—source data 1. [file elife-36696-fig4-data1.xlsx]

## Sheet: Sheet1
	SF7761_NT	SF7761_shSuz12-1	SF7761_shSuz12-2	SF8628_NT	SF8628_shSuz12-1	SF8628_shSuz12-2		STD	SF7761_NT	SF7761_shSuz12-1	SF7761_shSuz12-2	SF8628_NT	SF8628_shSuz12-1	SF8628_shSuz12-2
WT1	1	5.50009	5.58716	1	5.06646	5.55542		WT1		1.31087	1.56762		1.00608	1.17199
NGFR	1	2.44986	2.2172	1	2.07632	2.29906		NGFR		0.252011	0.372762		0.228536	0.372762
MME	1	2.77062	3.3112	1	2.75078	3.84451		MME		0.586003	1.51082		0.306658	0.324193
P16	1	2.29597	2.11276	1	2.21066	2.57376		P16		0.235396	0.241272		0.219556	0.235726
Suz12	1	0.226164	0.17099	1	0.048118	0.0585842		Suz12		0.0619842	0.0411676		0.0129927	0.015304
