# Supplementary material for: H3.3K27M mutant proteins reprogram epigenome by sequestering the PRC2 complex to poised enhancers
Source: eLife. 2018 Jun 22;7:e36696. doi: 10.7554/eLife.36696 (PMC6033537; doi:10.7554/eLife.36696)
Supplement: Figure 5—source data 1. [file elife-36696-fig5-data1.xlsx]

## Sheet: Sheet5
	HA ChIP	WT1	CDK6 NM_001145306	H3K27me3 ChIP	WT1	CDK6 NM_001145306	H3K27ac ChIP	WT1	CDK6 NM_001145306	Ezh2 ChIP	WT1	CDK6 NM_001145306
	8628	0.00270183	0.0012466	8628	7.65741	0.0314837	8628	0.0880362	1.47306	8628	2.11131	0.00203375
	dcas9	0.00921387	0.0128589	dcas9	6.77417	0.00522019	dcas9	0.115036	1.22245	dcas9	1.50124	0.131908
	P300	0.0133176	0.0160777	P300	6.56894	0.00406601	P300	0.0544968	1.43608	P300	1.81942	0.00193084
	dcas9 WT1sg1	5.53321	0.0127748	dcas9 WT1sg1	6.55489	0.00839682	dcas9 WT1sg1	0.07006	1.29832	dcas9 WT1sg1	1.80469	0.0489969
	dcas9 WT1sg2	7.46686	0.0193733	dcas9 WT1sg2	7.06596	0.0296968	dcas9 WT1sg2	0.106281	1.18005	dcas9 WT1sg2	2.17176	0.0215862
	P300 WT1sg1	5.99074	0.036882	P300 WT1sg1	0.516091	0.00630057	P300 WT1sg1	2.99849	1.5606	P300 WT1sg1	0.388422	0.00119042
	P300 WT1sg2	8.98635	0.0377475	P300 WT1sg2	0.655062	0.00199107	P300 WT1sg2	2.16765	1.99489	P300 WT1sg2	0.282993	0.0210307
STD	HA ChIP	WT1	CDK6 NM_001145306	H3K27me3 ChIP	WT1	CDK6 NM_001145306	H3K27ac ChIP	WT1	CDK6 NM_001145306	Ezh2 ChIP	WT1	CDK6 NM_001145306
	8628	0.0018476	0.00158349	8628	0.99358	0.0540038	8628	0.0664653	0.316848	8628	0.628966	0.00210911
	dcas9	0.00566054	0.00409698	dcas9	0.40467	0.00288859	dcas9	0.123427	0.113291	dcas9	0.385254	0.118675
	P300	0.00608437	0.01792	P300	2.38181	0.00304001	P300	0.0362478	0.28298	P300	0.627217	0.00150229
	dcas9 WT1sg1	1.13325	0.0118142	dcas9 WT1sg1	0.327094	0.00532789	dcas9 WT1sg1	0.0223489	0.163886	dcas9 WT1sg1	0.292969	0.0639519
	dcas9 WT1sg2	1.37604	0.0223913	dcas9 WT1sg2	2.44566	0.0243686	dcas9 WT1sg2	0.0780918	0.165134	dcas9 WT1sg2	0.386949	0.0145214
	P300 WT1sg1	1.79213	0.0346097	P300 WT1sg1	0.324448	0.0066007	P300 WT1sg1	0.497816	0.465537	P300 WT1sg1	0.0784434	0.000402044
	P300 WT1sg2	1.23541	0.0181342	P300 WT1sg2	0.107692	0.000539355	P300 WT1sg2	1.04939	0.539633	P300 WT1sg2	0.101639	0.017043
