# Supplementary material for: H3.3K27M mutant proteins reprogram epigenome by sequestering the PRC2 complex to poised enhancers
Source: eLife. 2018 Jun 22;7:e36696. doi: 10.7554/eLife.36696 (PMC6033537; doi:10.7554/eLife.36696)
Supplement: Figure 5—source data 2. [file elife-36696-fig5-data2.xlsx]

## Sheet: Sheet1
SF8628	1		STD	SF8628	0
dcas9	1.64924			dcas9	0.699095
P300	1.58446			P300	0.980246
dcas9 WT1sg1	0.972275			dcas9 WT1sg1	0.210147
dcas9 WT1sg2	1.116			dcas9 WT1sg2	0.208377
p300 WT1sg1	20.8449			p300 WT1sg1	3.0388
p300 WT1sg2	14.6466			p300 WT1sg2	2.77572
