# Supplementary material for: H3.3K27M mutant proteins reprogram epigenome by sequestering the PRC2 complex to poised enhancers
Source: eLife. 2018 Jun 22;7:e36696. doi: 10.7554/eLife.36696 (PMC6033537; doi:10.7554/eLife.36696)
Supplement: Figure 5—source data 3. [file elife-36696-fig5-data3.xlsx]

## Sheet: Sheet1
	Day 1	Day 3	Day 5		STD	Day 1	Day 3	Day 5
SF8628	1	3.03688	7.46221		SF8628	0	0.410948	0.315642
dcas9	1	3.23774	6.82248		dcas9	0	0.215563	0.314546
dcas9-300	1	2.91119	7.42418		dcas9-300	0	0.203316	0.674477
dcas9 WT1sgRNA#1	1	3.40553	7.71877		dcas9 WT1sgRNA#1	0	0.302952	0.360559
dcas9 WT1sgRNA#2	1	3.10085	8.22035		dcas9 WT1sgRNA#2	0	0.329562	1.07301
dcas9-p300 WT1sgRNA#1	1	2.10938	4.8691		dcas9-p300 WT1sgRNA#1	0	0.217694	0.810931
dcas9-p300 WT1sgRNA#2	1	2.16186	4.32889		dcas9-p300 WT1sgRNA#2	0	0.212695	0.590388
